# Supplementary material for: Arthropod diversity in two Historic Gardens in the Azores, Portugal
Source: Biodivers Data J. 2020 Aug 6;8:e54749. doi: 10.3897/BDJ.8.e54749 (PMC7426280; doi:10.3897/BDJ.8.e54749)
Supplement: Supplementary material 1 — List of plant species of Faial Botanic Garden (JBF) and Duque da Terceira Garden (JDT) [file bdj-08-e54749-s001.xlsx]

## Sheet: Sheet1
Table S1 – List of plant species of Faial Botanic Garden (JBF) and Duque da Terceira Garden (JDT)
Division	Class	Order	Family	Species	JBF	JDT
1_Lycopodiophyta	Isoetopsida	Isoetales	Isoetaceae	Isoetes azorica Durieu ex Milde	x
	Lycopodiopsida	Lycopodiales	Lycopodiaceae	Lycopodiella cernua (L.) Pic. Serm.	x
	Selaginellopsida	Selaginellales	Selaginellaceae	Selaginella kraussiana (Kunze) A. Braun	x
1_Pteridophyta	Equisetopsida	Equisetales	Equisetaceae	Equisetum telmateia Ehrh.	x
	Polypodiopsida	Cyatheales	Cyatheaceae	Cyathea cooperi (Hook. ex F. Muell.) Domin		x
				Sphaeropteris cooperi (F. Muell.) R.M. Tryon	x
				Sphaeropteris medullaris (G. Forst.) Bernh.	x
			Dicksoniaceae	Dicksonia antarctica Labill.	x
		Osmundales	Osmundaceae	Osmunda regalis L.	x
		Polypodiales	Aspleniaceae	Asplenium marinum L.	x
				Asplenium obovatum subsp. lanceolatum P. Silva	x
				Asplenium scolopendrium L.	x
				Asplenium trichomanes subsp. quadrivalens D.E. Mey.	x
			Blechnaceae	Blechnum spicant (L.) Sm.	x
				Woodwardia radicans (L.) Sm.	x
			Dryopteridaceae	Dryopteris aemula (Aiton) Kuntze	x
				Dryopteris affinis (Lowe) Fraser-Jenk. subsp. affinis	x
				Elaphoglossum semicylindricum Benl	x
			Lomariopsidaceae	Nephrolepis cordifolia (L.) C. Presl		x
			Nephrolepidaceae	Nephrolepis exaltata (L.) Schott	x
				Nephrolepis exaltata (L.) Schott cultivar 'Fluffy ruffles'	x
			Polypodiaceae	Polypodium azoricum R. Fern.	x	x
			Pteridaceae	Pteris tremula R. Br.	x
			Thelypteridaceae	Christella dentata (Forssk.) Brownsey & Jermy		x
			Woodsiaceae	Athyrium filix-femina (L.) Roth	x
				Diplazium caudatum Jermy	x
		Salviniales	Marsileaceae	Marsilea hirsuta R. Br.	x
	Psilotopsida	Ophioglossales	Ophioglossaceae	Ophiopogon japonicus (L. f.) Ker Gawl.	x
2_Ginkgophyta	Ginkgopsida	Ginkgoales	Ginkgoaceae	Ginkgo biloba L.		x
3_Cycadophyta	Cycadopsida	Cycadales	Cycadaceae	Cycas circinalis L.		x
				Cycas revoluta Thunb.		x
			Zamiaceae	Zamia furfuracea Aiton		x
4_Pinophyta	Pinopsida	Araucariales	Araucariaceae	Araucaria heterophylla (Salisb.) Franco		x
		Cupressales	Cupressaceae	Chamaecyparis lawsoniana (A. Murray) Parl.		x
				Thuja occidentalis L.		x
		Pinales	Cupressaceae	Juniperus brevifolia (Seub.) Antoine	x
			Pinaceae	Cedrus atlantica (Endl.) Manetti ex Carrière		x
				Cedrus Iibani A. Rich.		x
		Podocarpales	Podocarpaceae	Podocarpus macrophyllus (Thunb.) Sweet		x
		Taxales	Taxaceae	Taxus baccata L.	x	x
5_Magnoliophyta	Liliopsida	Alismatales	Araceae	Anthurium sp.		x
				Colocasia esculenta (L.) Schott	x
				Monstera deliciosa Liebm.	x	x
			Potamogetonaceae	Potamogeton polygonifolius Pourr.	x
		Arecales	Arecaceae	Archontophoenix cunninghamiana H. Wendl. & Drude		x
				Livistona chinensis (Jacq.) R. Br. ex Mart.		x
				Phoenix canariensis hort. ex Chabaud		x
				Phoenix dactylifera L.		x
				Phoenix reclinata Jacq.		x
				Syagrus romanzoffiana (Cham.) Glassman		x
				Trachycarpus fortunei (Benth.) Kuntze		x
				Washingtonia filifera (Linden ex André) H. Wendl.		x
		Asparagales	Amaryllidaceae	Agapanthus africanus (L.) Hoffmanns.	x
				Agapanthus sp.		x
				Allium sativum L.	x
				Allium schoenoprasum L.	x
				Clivia miniata Regel	x	x
			Asparagaceae	Agave americana L.		x
				Agave americana L. var. 'Marginata'		x
				Agave attenuata Salm-Dyck		x
				Asparagus densiflorus (Kunth) Jessop	x	x
				Asparagus setaceus (Kunth) Jessop		x
				Asparagus sp.		x
				Chlorophytum comosum (Thunb.) Jacques	x	x
				Chlorophytum comosum (Thunb.) Jacques var. 'Variegatum'		x
				Cordyline australis Hook. f.	x	x
				Cordyline stricta Hook. f. cultivar 'Latifolia'	x
				Dracaena draco (L.) L. subsp. draco	x	x
				Furcraea foetida (L.) Haw.		x
				Kalanchoe blossfeldiana Poelln.	x
				Liriope muscari (Decne.) L.H. Bailey	x
				Ruscus aculeatus L.		x
				Ruscus hypoglossum L.		x
				Sansevieria trifasciata Prain		x
				Yucca gloriosa L.		x
				Yucca gloriosa L. var. 'Variegata'		x
			Asphodelaceae	Aloe ciliaris Haw.		x
				Aloe saponaria (Aiton) Haw.		x
			Iridaceae	Tigridia pavonia (L. f.) DC.	x
			Orchidaceae	Platanthera micrantha (Hochst.) Schltr.	x
			Xanthorrhoeaceae	Aloe arborescens Mill.		x
				Aloe vera (L.) Burm. f.	x
				Hemerocallis fulva (L.) L.	x
				Kniphofia uvaria (L.) Oken	x
		Liliales	Liliaceae	Lilium sp.		x
			Smilacaceae	Smilax azorica H. Schaef. & P. Schoenfelder	x
		Poales	Bromeliaceae	Aechmea fasciata (Lindl.) Baker		x
				Ananas comosus (L.) Merr. cultivar 'Cayenne'	x
				Neoregelia carolinae fo. 'Tricolor'		x
			Cyperaceae	Carex hochstetteriana J. Gay ex Seub.	x
				Carex pendula Huds.	x
				Carex peregrina Link	x
				Cyperus involucratus Rottb.		x
				Cyperus papyrus L.		x
			Juncaceae	Juncus acutus L.	x
				Juncus effusus L.	x
				Juncus maritimus Lam.	x
				Luzula purpureosplendens Seub.	x
			Poaceae	Bambusa vulgaris Schrad. ex J.C. Wendl.		x
				Brachypodium sylvaticum (Huds.) P. Beauv.	x
				Cortaderia selloana (Schult. & Schult. fil.) Asch. & Graebn.		x
				Cymbopogon citratus (DC.) Stapf	x
				Festuca glauca Vill.		x
				Festuca petraea Guthn. ex Seub.	x
				Holcus rigidus Hochst.	x
				Pseudosasa japonica (Siebold & Zucc. ex Steud.) Makino ex Nakai		x
				Saccharum officinarum L.	x
				Triticum aestivum L.	x
				Zea mays L.	x
		Saxifragales	Crassulaceae	Crassula argentea Thunb.		x
				Sedum morganianum E. Walther		x
			Hamamelidaceae	Loropetalum chinensis (R.Br.) Oliv.		x
		Zingiberales	Cannaceae	Canna x generalis L.H. Bailey & E.Z. Bailey		x
			Musaceae	Musa sp.	x
			Strelitziaceae	Strelitzia nicolai Regel & Körn.	x	x
				Strelitzia reginae Aiton		x
	Magnoliopsida	Apiales	Apiaceae	Ammi seubertianum Trel.	x
				Ammi trifoliatum Trel.	x
				Apium graveolens L.	x
				Chaerophyllum azoricum Trel.	x
				Coriandrum sativum L.	x
				Crithmum maritimum L.	x
				Daucus carota subsp. azoricus Franco	x
				Foeniculum vulgare Mill.	x
				Petroselinum crispum (Mill.) Fuss	x
				Sanicula azorica Guthn. ex Seub.	x
			Araliaceae	Fatsia japonica (Thunb.) Decne. & Planch.	x
				Hedera azorica Carrière	x
				Hedera canariensis Willd.		x
				Hedera helix L.		x
				Schefflera arboricola (Hayata) Merr.		x
				Schefflera veitchii (hort. ex Carrière) Frodin & Lowry		x
			Pittosporaceae	Pittosporum tenuifolium Banks & Sol. ex Gaertn. var. 'Variegatum'		x
				Pittosporum tobira (Thunb.) Aiton		x
				Pittosporum undulatum Vent.		x
		Aquifoliales	Aquifoliaceae	Ilex aquifolium L.		x
				Ilex perado subsp. azorica (Loes.) Tutin	x
		Arecales	Arecaceae	Howea forsteriana (F. Muell. & H. Wendl.) Becc.	x	x
		Asterales	Asteraceae	Achillea millefolium L.	x
				Artemisia arborescens L.	x
				Calendula officinalis L.	x
				Catananche caerulea L.	x
				Centaurea cyanus L.	x
				Chamaemelum mixtum (L.) All.	x
				Cosmos sulphureus Cav.	x
				Dahlia coccinea Cav.	x
				Dahlia merckii Lehm.	x
				Gaillardia x grandiflora		x
				Pericallis malvifolia (L'Hérit.) B. Nord.	x
				Pseudognaphalium luteoalbum (L.) Hilliard & B.L. Burtt	x
				Santolina rosmarinifolia L.	x
				Senecio cineraria DC.		x
				Senecio douglasii DC.		x
				Senecio petasitis (Sims) DC.		x
				Silybum marianum (L.) Gaertn.	x
				Solidago azorica Hochst. ex Seub.	x
				Tanacetum parthenium (L.) Sch. Bip.	x
				Taraxacum officinale F.H. Wigg.	x
				Tolpis azorica (Nutt.) P. Silva	x
				Tolpis succulenta Lowe	x
			Campanulaceae	Azorina vidalii (H.C. Wats.) Feer	x
				Lobelia siphilitica L.	x
		Boraginales	Boraginaceae	Borago officinalis L.	x
				Myosotis azorica H.C.Watson	x
				Myosotis maritima Hochst. ex Seub.	x
		Brassicales	Brassicaceae	Cardamine caldeirarum Guthnick ex Seub.	x
				Iberis umbellata L.	x
				Isatis tinctoria L.	x
				Lobularia maritima (L.) Desv.	x
			Limnanthaceae	Limnanthes douglasii R. Br.	x
		Buxales	Buxaceae	Buxus sempervirens L.		x
		Caryophyllales	Amaranthaceae	Gomphrena globosa L.	x
			Caryophyllaceae	Cerastium azoricum Hochst. ex Seub.	x
				Dianthus chinensis L.		x
				Dianthus barbatus L.	x
				Silene uniflora Roth subsp. uniflora	x
				Spergularia azorica (Kindb.) Lebel	x
			Nyctaginaceae	Bougainvillea spectabilis Willd.		x
			Phytolaccaceae	Phytolacca dioica L.		x
			Plumbaginaceae	Limonium vulgare Mill.	x
			Polygonaceae	Muehlenbeckia complexa Meissn.		x
				Rumex azoricus Rech. f.	x
		Celastrales	Celastraceae	Euonymus japonicus L. f.		x
				Euonymus japonicus L. f. var. 'Aureomarginatus'		x
		Cornales	Hydrangeaceae	Hydrangea macrophylla (Thunb.) Ser. var. 'Blaumeise'		x
			Sapindaceae	Aesculus X carnea		x
		Cucurbitales	Begoniaceae	Begonia cucullata Willd. var. 'Hookeri'	x
			Corynocarpaceae	Corynocarpus laevigatus J. R. Forst. & G. Forst.		x
		Dipsacales	Adoxaceae	Viburnum treleasei Gand.	x
			Caprifoliaceae	Abelia × grandiflora (Rovelli ex André) Rehder	x	x
				Lonicera japonica Thunb. cultivar 'Halliana'	x
				Sambucus nigra L.	x
			Dipsacaceae	Scabiosa nitens Roem. & Schult.	x
			Viburnaceae	Viburnum opulus L.	x
		Ericales	Balsaminaceae	Impatiens walleriana Hook. f.	x
			Ericaceae	Arbutus unedo L.		x
				Calluna vulgaris (L.) Hull	x
				Corema album subsp. azoricum P. Silva	x
				Daboecia azorica Tutin & E.F. Warb.	x
				Erica azorica Hochst. ex Seub.	x
				Rhododendron indicum (L.) Sweet		x
				Rhododendron molle (Blume) G. Don cultivar 'Amoena'	x
				Rhododendron molle (Blume) G. Don cultivar 'Blaauw‘s pink'	x
				Rhododendron molle (Blume) G. Don cultivar 'Campfire'	x
				Rhododendron molle (Blume) G. Don cultivar 'Eliyabeth'	x
				Rhododendron ponticum L.	x
				Vaccinium cylindraceum Sm.	x
			Myrsinaceae	Myrsine africana L.	x
			Primulaceae	Lysimachia azorica Hornem ex Hook.	x
			Theaceae	Camellia japonica L.	x	x
				Camellia sinensis (L.) Kuntze	x
		Fabales	Fabaceae	Bauhinia variegata L.		x
				Ceratonia siliqua L.		x
				Cytisus scoparius (L.) Link	x
				Erythrina crista-galli L.		x
				Erythrina speciosa Andrews		x
				Lotus azoricus P.W. Ball	x
				Robinia pseudoacacia L.		x
				Senna bicapsularis (L.) Roxb.		x
				Tipuana tipu (Benth.) Kuntze		x
				Vicia faba L.	x
				Wisteria sinensis (Sims) DC.	x	x
		Fagales	Betulaceae	Corylus avellana L.	x
				Corylus maxima Mill. cultivar 'Purpurea'	x
			Fagaceae	Quercus robur L.	x	x
				Quercus palustris Münchh.	x
			Myricaceae	Morella faya (Aiton) Wilbur	x
		Garryales	Garryaceae	Aucuba japonica Thunb.		x
		Gentianales	Apocynaceae	Nerium oleander L.		x
				Plumeria rubra L.		x
			Rubiaceae	Coffea arabica L.		x
				Coprosma repens A. Rich.		x
				Gardenia jasminoides J. Ellis	x
		Geraniales	Geraniaceae	Geranium rotundifolium L.	x
				Pelargonium sp.		x
		Lamiales	Acanthaceae	Acanthus mollis L.	x	x
				Justicia carnea Lindl.		x
			Bignoniaceae	Spathodea campanulata P. Beauv.		x
			Lamiaceae	Ajuga reptans L.	x
				Clinopodium ascendens (Jord.) Samp.	x
				Lavandula angustifolia Mill.	x
				Lavandula dentata L.	x
				Marrubium vulgare L.	x
				Melissa officinalis L.	x
				Mentha aquatica L.	x
				Mentha pulegium L.	x
				Mentha spicata L.	x
				Mentha x piperita L.	x
				Ocimum basilicum L. cultivar 'Genovese'	x
				Origanum vulgare L.	x
				Prunella vulgaris L.	x
				Rosmarinus officinalis L.	x
				Salvia officinalis L.	x
				Satureja montana L.	x
				Solenostemon sp.		x
				Thymus caespititius Brot.	x
				Thymus serpyllum L.	x
				Thymus vulgaris L.	x
			Oleaceae	Jasminum mesnyi Hance		x
				Picconia azorica (Tutin) Knobl.	x
			Plantaginaceae	Plantago coronopus L.	x
			Scrophulariaceae	Sibthorpia europaea L.	x
				Veronica dabneyi Hochst. ex Seub.	x
			Verbenaceae	Aloysia citrodora Palàu	x
				Duranta erecta L.		x
				Duranta repens L.		x
				Lantana camara L.		x
				Verbena × hybrida Groenl. & Rümpler	x
		Laurales	Calycanthaceae	Calycanthus floridus L.		x
			Lauraceae	Cinnamomum camphora (L.) J. Presl		x
				Laurus azorica (Seub.) Franco	x
				Laurus nobilis L.		x
				Ocotea foetens (Aiton) Baill.	x
				Persea americana Mill.		x
				Persea indica (L.) C. K. Sprengel		x
		Magnoliales	Magnoliaceae	Liriodendron tulipifera L.		x
				Magnolia denudata Desr.		x
				Magnolia grandiflora L.	x	x
				Magnolia stellata (Siebold & Zucc.) Maxim.		x
				Magnolia x soulangeana Soul.-Bod.	x	x
				Michelia figo (Lour.) Spreng.		x
		Malpighiales	Euphorbiaceae	Acalypha wilkesiana Müll. Arg.		x
				Euphorbia pulcherrima Willd. ex Klotzsch		x
				Euphorbia azorica Hochst.	x
				Euphorbia stygiana H.C. Watson subsp. stygiana	x
			Hypericaceae	Hypericum foliosum Aiton	x
			Salicaceae	Populus nigra L.		x
			Violaceae	Viola tricolor L.	x	x
		Malvales	Malvaceae	Abutilon pictum (Gillies ex Hook. & Arn.) Walp.	x
				Brachychiton acerifolius (A. Cunn.) Macarthur & C. Moore		x
				Brachychiton rupestris K. Schum.		x
				Ceiba speciosa (A. St.-Hil.) Ravenna		x
				Hibiscus rosa-sinensis L.	x	x
				Hibiscus syriacus L.	x	x
				Hibiscus syriacus L. cultivar 'Notwoodone'	x
				Lagunaria patersonii (Andr.) G. Don		x
				Malva sylvestris L.	x
				Pachira aquatica Aubl.		x
				Tilia tomentosa Moench		x
				Tilia europaea L.	x
		Myrtales	Lythraceae	Lagerstroemia indica L.	x	x
			Melastomataceae	Tibouchina urvilleana (DC.) Cogn.		x
			Myrtaceae	Callistemon citrinus (Curtis) Skeels		x
				Corymbia ficifolia (F. Muell.) K.D. Hill & L.A.S. Johnson		x
				Eucalyptus citriodora Hook.		x
				Eucalyptus globulus Labill.		x
				Eugenia involucrata DC.		x
				Eugenia uniflora L.		x
				Leptospermum scoparium J. R. Forst. & G. Forst.		x
				Metrosideros excelsa Sol. ex P. Gaertn.		x
				Metrosideros excelsa Sol. ex P. Gaertn. var. 'Variegata'		x
				Metrosideros thomasii Banks ex Gaertn.		x
				Myrtus communis L.		x
				Myrtus communis subsp. tarentina (L.) Nyman		x
				Psidium cattleyanum Sabine	x
			Onagraceae	Fuchsia magellanica Lam.	x
				Fuchsia sp.		x
				Fuchsia corymbiflora Ruiz & Pav.	x
				Fuchsia hybrida hort. ex Siebert & Voss cultivar 'Swingtime'	x
				Fuchsia triphylla L.	x
		Nymphaeales	Nymphaeaceae	Nymphaea alba L.	x
		Proteales	Platanaceae	Platanus x hybrida		x
			Proteaceae	Grevillea juniperina R. Br.		x
				Grevillea robusta A. Cunn. ex R. Br.		x
		Ranunculales	Berberidaceae	Berberis thunbergii DC.		x
				Nandina domestica Thunb.	x	x
			Papaveraceae	Chelidonium majus L.	x
			Ranunculaceae	Ranunculus cortusifolius Willd.	x
		Rosales	Moraceae	Ficus benjamina L. var. 'Variegata'		x
				Ficus microcarpa L. f.		x
				Ficus pumila L.		x
				Ficus radicans Desf.		x
				Morus alba L.		x
			Rhamnaceae	Frangula azorica Grubov	x
			Rosaceae	Fragaria × ananassa Duchesne ex Rozier	x
				Fragaria vesca L.	x
				Malus domestica Borkh.	x
				Prunus azorica (Hort. ex Mouillef.) Rivas Mart., Lousã, Fern. Prieto, E. Dias, J. C. Costa & C. Aguiar	x
				Prunus cerasifera Ehrh. var. pissardii (Carrière) Koehne		x
				Prunus laurocerasus L.	x
				Pyracantha angustifolia (Franch.) C.K. Schneid.		x
				Rhaphiolepis umbellata (Thunb.) Makino		x
				Rosa sp.		x
				Rubus hochstetterorum Seub.	x
				Sanguisorba officinalis L.	x
				Spiraea cantonensis Lour.	x
				Spiraea cantoniensis Lour.		x
		Sapindales	Anacardiaceae	Pistacia terebinthus L.		x
			Rutaceae	Choisya ternata Kunth		x
				Citrus limon (L.) Osbeck	x
				Citrus sinensis (L.) Osbeck	x
				Ruta graveolens L.	x
			Sapindaceae	Acer negundo L.	x
				Acer platanoides L. cultivar 'Crimson sentry'	x
				Aesculus hippocastanum L.	x
		Saxifragales	Crassulaceae	Umbilicus horizontalis (Guss.) DC.	x
		Solanales	Convolvulaceae	Ipomoea batatas (L.) Lam.	x
			Solanaceae	Brunfelsia latifolia (Pohl) Benth. //Brunfelsia uniflora (Pohl) D. Don		x
				Nicotiana tabacum L.	x
				Solanum rantonnetii Carrière		x
		Urticales	Celtidaceae	Celtis australis L.		x
		Vitales	Vitaceae	Vitis vinifera L.	x
