# Supplementary material for: Arthropod diversity in two Historic Gardens in the Azores, Portugal
Source: Biodivers Data J. 2020 Aug 6;8:e54749. doi: 10.3897/BDJ.8.e54749 (PMC7426280; doi:10.3897/BDJ.8.e54749)
Supplement: Supplementary material 2 — Arthropod species list of Faial Botanic Garden and Duque da Terceira Garden [file bdj-08-e54749-s002.xlsx]

## Sheet: Sp list JB
Table S2. Arthropod species list of Faial Botanic Garden and Duque da Terceira Garden. (*1) indicates new species record in Faial; (*2) indicates new species record in Terceira and (**) indicates new species record in Azores
						Faial Botanic Garden			Duque da Terceira Garden				New record FAI	*1
Class	Order	Family	Species	MF	N/E/I	Adults	Juveniles		Adults	Juveniles	Grand Total		New record TER	*2
Arachnida	Araneae	Agelenidae	Textrix caudata L. Koch, 1872	1082	I	2	8		0	0	10		New record in Azores	**
Arachnida	Araneae	Araneidae	Agalenatea redii (Scopoli, 1763)	1130	I	0	0		4	7	11
Arachnida	Araneae	Araneidae	Argiope bruennichi (Scopoli, 1772)	1283	N	0	0		0	2	2
Arachnida	Araneae	Araneidae	Mangora acalypha (Walckenaer, 1802)	228	I	1	0		0	0	1
Arachnida	Araneae	Araneidae	Neoscona crucifera (Lucas, 1838)	1309	I	8	279		0	44	331
Arachnida	Araneae	Araneidae	Zygiella x-notata (Clerck, 1757)	1057	I	0	8		1	1	10
Arachnida	Araneae	Clubionidae	Porrhoclubiona decora (Blackwall, 1859)	516	N	23	149		50	242	464
Arachnida	Araneae	Clubionidae	Porrhoclubiona genevensis (L. Koch, 1866)	688	I	2	1		2	0	5
Arachnida	Araneae	Clubionidae	Clubiona terrestris Westring, 1851	122	I	2	0		0	0	2
Arachnida	Araneae	Dictynidae	Emblyna acoreensis Wunderlich, 1992	539	E	32	18		4	3	57
Arachnida	Araneae	Dictynidae	Nigma puella (Simon, 1870)	618	I	8	5		4	11	28
Arachnida	Araneae	Eutichuridae	Cheiracanthium mildei L. Koch, 1864 *1	1285	I	1	1		0	0	2
Arachnida	Araneae	Gnaphosidae	Gen. sp.1 (Juvenile)	384	I	0	0		1	0	1
Arachnida	Araneae	Linyphiidae	Entelecara schmitzi Kulczynski, 1905	789	I	31	40		3	1	75
Arachnida	Araneae	Linyphiidae	Erigone atra Blackwall, 1833	34	I	0	1		1	0	2
Arachnida	Araneae	Linyphiidae	Erigone autumnalis Emerton, 1882	234	I	0	0		1	0	1
Arachnida	Araneae	Linyphiidae	Meioneta fuscipalpa (C. L. Koch, 1836)	330	I	0	0		8	0	8
Arachnida	Araneae	Linyphiidae	Mermessus bryantae (Ivie & Barrows, 1935)	249	I	1	0		0	0	1
Arachnida	Araneae	Linyphiidae	Mermessus fradeorum (Berland, 1932)	24	I	0	2		0	0	2
Arachnida	Araneae	Linyphiidae	Microlinyphia johnsoni (Blackwall, 1859)	697	N	0	0		1	0	1
Arachnida	Araneae	Linyphiidae	Neriene clathrata (Sundevall, 1830)	735	I	1	0		1	0	2
Arachnida	Araneae	Linyphiidae	Pelecopsis parallela (Wider, 1834)	235	I	1	0		1	0	2
Arachnida	Araneae	Linyphiidae	Tenuiphantes tenuis (Blackwall, 1852)	21	I	15	8		10	4	37
Arachnida	Araneae	Mimetidae	Ero aphana (Walckenaer, 1802)	1184	I	0	0		5	0	5
Arachnida	Araneae	Mimetidae	Ero sp.	1405	I	1	0		0	0	1
Arachnida	Araneae	Oecobiidae	Oecobius navus Blackwall, 1859	653	I	0	0		0	1	1
Arachnida	Araneae	Pholcidae	Pholcus phalangioides (Fuesslin, 1775)	859	I	0	0		0	2	2
Arachnida	Araneae	Salticidae	Chalcoscirtus infimus (Simon, 1868)	1071	I	0	0		2	0	2
Arachnida	Araneae	Salticidae	Macaroeris diligens (Blackwall, 1867)	793	N	0	0		3	14	17
Arachnida	Araneae	Salticidae	Pseudeuophrys vafra (Blackwall, 1867)	634	I	0	0		1	9	10
Arachnida	Araneae	Salticidae	Salticus mutabilis Lucas, 1846	804	I	0	0		2	1	3
Arachnida	Araneae	Tetragnathidae	Metellina merianae (Scopoli, 1763)	133	I	0	2		0	1	3
Arachnida	Araneae	Theridiidae	Cryptachaea blattea (Urquhart, 1886)	488	I	12	3		0	4	19
Arachnida	Araneae	Theridiidae	Gen. sp.	1406	I	11	12		0	0	23
Arachnida	Araneae	Theridiidae	Paidiscura orotavensis (Schmidt, 1968) ** *2	1368	N	0	0		9	6	15
Arachnida	Araneae	Theridiidae	Parasteatoda tepidariorum (C.L. Koch, 1841)	1075	I	0	0		3	1	4
Arachnida	Araneae	Theridiidae	Steatoda grossa (C.L. Koch, 1838)	127	I	1	42		0	0	43
Arachnida	Araneae	Theridiidae	Steatoda nobilis (Thorell, 1875)	869	I	3	5		3	7	18
Arachnida	Araneae	Theridiidae	Theridion hannoniae Denis, 1944	1286	I	0	0		1	0	1
Arachnida	Araneae	Theridiidae	Theridion musivivum Schmidt, 1956	241	N	2	0		0	0	2
Arachnida	Araneae	Thomisidae	Gen. sp.	A1	?	0	0		9	5	14
Arachnida	Opiliones	Phalangiidae	Leiobunum blackwalli Meade, 1861	6	N	138	4		0	0	142
Arachnida	Pseudoscorpiones	Chthoniidae	Chthonius ischnocheles (Hermann, 1804)	38	I	0	2		0	0	2
Arachnida	Pseudoscorpiones	Chthoniidae	Chthonius tetrachelatus (Preyssler, 1790)	103	I	0	0		2	0	2
Arachnida	Pseudoscorpiones	Chthoniidae	Chthonius sp.	1307	I	0	0		2	0	2
Chilopoda	Scutigeromorpha	Scutigeridae	Scutigera coleoptrata (Linnaeus, 1758)	336	I	0	0		69	2	71
Diplopoda	Julida	Julidae	Ommatoiulus moreletii (Lucas, 1860)	9	I	4	25		4	40	73
Insecta	Coleoptera	??	Gen. sp.1	1270	I	0	0		5	0	5
Insecta	Coleoptera	??	Gen. sp.2	1273	I	0	0		6	0	6
Insecta	Coleoptera	??	Gen. sp.3	1278	I	0	0		2	0	2
Insecta	Coleoptera	??	Gen. sp.4	1388	I	0	0		2	0	2
Insecta	Coleoptera	??	Gen. sp.5	1390	I	0	0		1	0	1
Insecta	Coleoptera	??	Gen. sp.6	1401	I	0	0		1	0	1
Insecta	Coleoptera	Anobiidae	Anobium punctatum (De Geer, 1774)	979	I	0	0		6	0	6
Insecta	Coleoptera	Anobiidae	Gen. sp.	1394	I	0	0		1	0	1
Insecta	Coleoptera	Brentidae	Aspidapion radiolus chalybeipenne (Wollaston 1854)	791	N	6	0		8	0	14
Insecta	Coleoptera	Brentidae	Kalcapion semivittatum semivittatum (Gyllenhal, 1833) *1	822	N	4	0		85	0	89
Insecta	Coleoptera	Carabidae	Dromius meridionalis Dejean, 1825	1062	I	3	0		0	0	3
Insecta	Coleoptera	Carabidae	Gen. sp.	1281	I	0	0		1	0	1
Insecta	Coleoptera	Cerambycidae	Gen. sp.	1319	I	0	0		2	0	2
Insecta	Coleoptera	Chrysomelidae	Chaetocnema hortensis (Fourcroy, 1785)	266	I	0	0		62	0	62
Insecta	Coleoptera	Chrysomelidae	Epitrix cucumeris (Harris, 1851)	225	I	0	0		172	0	172
Insecta	Coleoptera	Chrysomelidae	Epitrix hirtipennis (Melsheimer, 1847)	833	I	0	0		4	0	4
Insecta	Coleoptera	Chrysomelidae	Gen. sp.1	1296	I	0	0		2	0	2
Insecta	Coleoptera	Chrysomelidae	Gen. sp.2	1372	I	2	0		0	0	2
Insecta	Coleoptera	Chrysomelidae	Gen. sp.3	1373	I	19	0		0	0	19
Insecta	Coleoptera	Chrysomelidae	Gen. sp.4	1403	I	1	0		0	0	1
Insecta	Coleoptera	Chrysomelidae	Gen. sp.5	1404	I	6	0		0	0	6
Insecta	Coleoptera	Chrysomelidae	Longitarsus kutscherae (Rye, 1872)*1	702	I	25	0		0	0	25
Insecta	Coleoptera	Chrysomelidae	Psylliodes marcidus (Illiger, 1807)	395	N	0	0		2	0	2
Insecta	Coleoptera	Coccinellidae	Clitostethus arcuatus (Rossi, 1794)	711	I	0	0		7	0	7
Insecta	Coleoptera	Coccinellidae	Nephus helgae Fürsch, 1965 *2	703	I	0	0		13	0	13
Insecta	Coleoptera	Coccinellidae	Scymnus interruptus (Goeze, 1777) + Scymnus nubilus Mulsant, 1850	646	N	0	0		162	0	162
Insecta	Coleoptera	Coccinellidae	Stethorus pusillus (Herbst, 1979)	805	N	0	0		20	0	20
Insecta	Coleoptera	Corylophidae	Gen. sp.1	1386	I	0	0		5	0	5
Insecta	Coleoptera	Corylophidae	Gen. sp.2	371	?	0	0		6	0	6
Insecta	Coleoptera	Corylophidae	Gen. sp.3	1110	I	0	0		1	0	1
Insecta	Coleoptera	Corylophidae	Sericoderus lateralis (Gyllenhal, 1827)	65	I	9	0		263	0	272
Insecta	Coleoptera	Cryptophagidae	Cryptophagus cellaris (Scopoli, 1763) *2	840	I	0	0		2	0	2
Insecta	Coleoptera	Cryptophagidae	Cryptophagus sp.1	145	I	12	0		3	0	15
Insecta	Coleoptera	Cryptophagidae	Gen. sp.1	1279	I	0	0		2	0	2
Insecta	Coleoptera	Cryptophagidae	Gen. sp.2	1298	I	0	0		1	0	1
Insecta	Coleoptera	Cryptophagidae	Gen. sp.3	1302	I	0	0		1	0	1
Insecta	Coleoptera	Cryptophagidae	Gen. sp.4	1391	I	0	0		1	0	1
Insecta	Coleoptera	Cryptophagidae	Gen. sp.5	1392	I	0	0		1	0	1
Insecta	Coleoptera	Cucujidae	Gen. sp.	1397	I	0	0		3	0	3
Insecta	Coleoptera	Curculionidae	Calacalles subcarinatus (Israelson, 1984)	141	E	1	0		0	0	1
Insecta	Coleoptera	Curculionidae	Coccotrypes carpophagus (Hornung, 1842)	120	I	0	0		69	0	69
Insecta	Coleoptera	Curculionidae	Sirocalodes mixtus (Mulsant & Rey, 1858)** *2	1267	I	0	0		1	0	1
Insecta	Coleoptera	Curculionidae	Gen. sp.1	1277	I	0	0		1	0	1
Insecta	Coleoptera	Curculionidae	Gen. sp.2	1376	I	0	0		1	0	1
Insecta	Coleoptera	Curculionidae	Gen. sp.3	1383	I	0	0		1	0	1
Insecta	Coleoptera	Curculionidae	Gen. sp.4	1384	I	0	0		1	0	1
Insecta	Coleoptera	Curculionidae	Gen. sp.5	1395	I	0	0		1	0	1
Insecta	Coleoptera	Curculionidae	Gymnetron pascuorum (Gyllenhal, 1813)	673	I	0	0		125	0	125
Insecta	Coleoptera	Curculionidae	Lixus pulverulentus (Scopoli 1763) *2	1121	I	0	0		4	0	4
Insecta	Coleoptera	Curculionidae	Naupactus leucoloma Boheman, 1840	1000	I	0	0		11	0	11
Insecta	Coleoptera	Curculionidae	Otiorhynchus cribricollis Gyllenhal, 1834	691	I	1	0		0	0	1
Insecta	Coleoptera	Curculionidae	Pantomorus cervinus (Boheman, 1849)	748	I	0	0		3	0	3
Insecta	Coleoptera	Curculionidae	Sitona sp.	1398	I	0	0		1	0	1
Insecta	Coleoptera	Dryophthoridae	Sitophilus oryzae (Linnaeus, 1763)	306	I	0	0		1	0	1
Insecta	Coleoptera	Elateridae	Heteroderes azoricus (Tarnier, 1860)	540	E	2	0		1	0	3
Insecta	Coleoptera	Elateridae	Heteroderes vagus Candèze, 1893	769	I	0	0		1	0	1
Insecta	Coleoptera	Hydrophilidae	Cercyon sp.1	342	I	1	0		0	0	1
Insecta	Coleoptera	Hydrophilidae	Gen. sp.	1301	I	0	0		2	0	2
Insecta	Coleoptera	Laemophloeidae	Gen. sp.1	705	I	0	0		1	0	1
Insecta	Coleoptera	Laemophloeidae	Gen. sp.2	773	I	0	0		2	0	2
Insecta	Coleoptera	Laemophloeidae	Gen. sp.3	944	I	0	0		1	0	1
Insecta	Coleoptera	Lathrididade	Gen. sp.1	1295	I	0	0		4	0	4
Insecta	Coleoptera	Lathrididade	Gen. sp.2	1377	I	0	0		1	0	1
Insecta	Coleoptera	Lathrididade	Gen. sp.3	1389	I	0	0		1	0	1
Insecta	Coleoptera	Lathridiidae	Cartodere bifasciata Reitter, 1877	733	I	1	0		28	0	29
Insecta	Coleoptera	Lathridiidae	Cartodere nodifer (Westwood, 1839)	710	I	0	0		4	0	4
Insecta	Coleoptera	Lathridiidae	Gen. sp.	938	?	0	0		1	0	1
Insecta	Coleoptera	Leiodidae	Gen. sp.	1308	I	0	0		1	0	1
Insecta	Coleoptera	Monotomidae	Monotoma sp.	708	I	5	0		2	0	7
Insecta	Coleoptera	Mycetophagidae	Litargus balteatus Le Conte, 1856	328	I	0	0		12	0	12
Insecta	Coleoptera	Mycetophagidae	Typhaea stercorea (Linnaeus, 1758)	113	I	0	0		7	0	7
Insecta	Coleoptera	Nitidulidae	Carpophilus sp.	1099	I	0	0		1	0	1
Insecta	Coleoptera	Nitidulidae	Epuraea sp.	1271	I	0	0		1	0	1
Insecta	Coleoptera	Nitidulidae	Gen. sp.1	1299	I	0	0		1	0	1
Insecta	Coleoptera	Nitidulidae	Gen. sp.2	1303	I	0	0		1	0	1
Insecta	Coleoptera	Nitidulidae	Gen. sp.3	1311	I	0	0		1	0	1
Insecta	Coleoptera	Nitidulidae	Gen. sp.4	1387	I	0	0		1	0	1
Insecta	Coleoptera	Nitidulidae	Gen. sp.5	1399	I	0	0		2	0	2
Insecta	Coleoptera	Nitidulidae	Gen. sp.6	1400	I	0	0		1	0	1
Insecta	Coleoptera	Nitidulidae	Phenolia limbata tibialis (Boheman, 1851)	462	I	0	0		2	0	2
Insecta	Coleoptera	Phalacridae	Gen. sp.1	1280	I	0	0		2	0	2
Insecta	Coleoptera	Phalacridae	Gen. sp.2	661	I?	0	0		1	0	1
Insecta	Coleoptera	Phalacridae	Stilbus testaceus (Panzer, 1797)	69	N	0	0		68	0	68
Insecta	Coleoptera	Ptiliidae	Ptenidium pusillum (Gyllenhal, 1808)	72	I	0	0		2	0	2
Insecta	Coleoptera	Scraptiidae	Anaspis proteus Wollaston, 1854	78	N	1	0		0	0	1
Insecta	Coleoptera	Silvanidae	Cryptamorpha desjardinsii (Guérin-Méneville, 1844)	108	I	0	0		2	0	2
Insecta	Coleoptera	Staphylinidae	Atheta (Mocyta) fungi (Gravenhorst, 1806)	16	I	0	0		62	0	62
Insecta	Coleoptera	Staphylinidae	Carpelimus corticinus (Gravenhorst, 1806)	377	N	0	0		5	0	5
Insecta	Coleoptera	Staphylinidae	Carpelimus sp.1	1272	I	0	0		1	0	1
Insecta	Coleoptera	Staphylinidae	Carpelimus sp.2	1305	I	0	0		1	0	1
Insecta	Coleoptera	Staphylinidae	Coproporus pulchellus (Erichson, 1839)	823	I	0	0		6	0	6
Insecta	Coleoptera	Staphylinidae	Cordalia obscura (Gravenhorst, 1802)	52	I	0	0		3	0	3
Insecta	Coleoptera	Staphylinidae	Gen. sp.1	1385	I	0	0		1	0	1
Insecta	Coleoptera	Staphylinidae	Gen. sp.2	1396	I	0	0		9	0	9
Insecta	Coleoptera	Staphylinidae	Hypomedon debilicornis (Wollaston, 1857)	1294	I	0	0		2	0	2
Insecta	Coleoptera	Staphylinidae	Myrmecocephalus concinnus (Erichson, 1840)	1304	I	0	0		1	0	1
Insecta	Coleoptera	Staphylinidae	Oligota pumilio Kiesenwetter, 1858	767	N	0	0		14	0	14
Insecta	Coleoptera	Staphylinidae	Proteinus atomarius Erichson, 1840	82	N	0	0		53	0	53
Insecta	Coleoptera	Staphylinidae	Rugilus orbiculatus orbiculatus (Paykull, 1789)	262	N	0	0		3	0	3
Insecta	Coleoptera	Staphylinidae	Scopaeus sp.	551	N	0	0		1	0	1
Insecta	Coleoptera	Staphylinidae	Stenomastax cf. maderae Assing, 2003	827	N	0	0		1	0	1
Insecta	Coleoptera	Staphylinidae	Sunius propinquus (Brisout de Barneville, 1867)	472	N	1	0		0	0	1
Insecta	Coleoptera	Staphylinidae	Tachyporus chrysomelinus (Linnaeus, 1758)	142	I	18	0		37	0	55
Insecta	Coleoptera	Staphylinidae	Tachyporus nitidulus (Fabricius, 1781)	89	I	48	0		24	0	72
Insecta	Coleoptera	Throscidae	Trixagus sp.1	549	I	12	0		0	0	12
Insecta	Coleoptera	Throscidae	Trixagus sp.2	843	I	0	0		13	0	13
Insecta	Dermaptera	Anisolabididae	Euborellia annulipes (Lucas, 1847)	352	I	4	0		0	0	4
Insecta	Dermaptera	Forficulidae	Forficula auricularia Linnaeus, 1758	56	I	2	0		0	0	2
Insecta	Dermaptera	Labiduridae	Labidura riparia (Pallas, 1773)	1238	N	3	1		0	0	4
Insecta	Dermaptera	Spongiphoridae	Labia minor (Linnaeus, 1758)	1268	I	0	0		0	2	2
Insecta	Hemiptera	Aleyroridae	Gen. sp.	1223	E	5	0		27	0	32
Insecta	Hemiptera	Anthocoridae	Anthocoris nemoralis (Fabricius, 1794)	390	N	0	0		8	3	11
Insecta	Hemiptera	Anthocoridae	Buchananiella continua (White, 1880)	326	I	0	0		4	0	4
Insecta	Hemiptera	Anthocoridae	Gen. sp.	1206	I	4	2		5	0	11
Insecta	Hemiptera	Anthocoridae	Lyctocoris campestris (Fabricius, 1794)	780	I	0	0		2	0	2
Insecta	Hemiptera	Anthocoridae	Orius laevigatus laevigatus (Fieber, 1860)	645	N	2	0		14	0	16
Insecta	Hemiptera	Cicadellidae	Eupteryx filicum (Newman, 1853) *1	1019	N	5	0		14	1	20
Insecta	Hemiptera	Cicadellidae	Euscelidius variegatus (Kirschbaum, 1858)	890	N	0	0		40	0	40
Insecta	Hemiptera	Cicadellidae	Gen. sp.1	1274	I	0	0		7	3	10
Insecta	Hemiptera	Cicadellidae	Gen. sp.2	1275	I	0	0		8	0	8
Insecta	Hemiptera	Cicadellidae	Gen. sp.3	1317	I	0	0		1	0	1
Insecta	Hemiptera	Cicadellidae	Gen. sp.4	1371	I	4	1		0	0	5
Insecta	Hemiptera	Cicadellidae	Gen. sp.5	1393	I	0	0		11	0	11
Insecta	Hemiptera	Cixiidae	Cixius azopifajo azofa Remane & Asche, 1979	613	E	1	0		0	0	1
Insecta	Hemiptera	Delphacidae	Kelisia ribauti Wagner, 1938	321	N	0	0		5	0	5
Insecta	Hemiptera	Flatidae	Cyphopterum adcendens (Herrich-Schäffer 1835)	124	N	0	725		0	0	725
Insecta	Hemiptera	Flatidae	Siphanta acuta (Walker, 1851)	1225	I	0	0		30	133	163
Insecta	Hemiptera	Lachnidae	Cinara juniperi (De Geer, 1773)	44	N	0	374		0	0	374
Insecta	Hemiptera	Lygaeidae	Aphanus rolandri (Linnaeus, 1758)	1126	N	0	0		3	1	4
Insecta	Hemiptera	Lygaeidae	Beosus maritimus (Scopoli, 1763)	782	N	0	0		1	0	1
Insecta	Hemiptera	Lygaeidae	Emblethis denticollis Horváth, 1878	774	N	0	0		1	0	1
Insecta	Hemiptera	Lygaeidae	Gen. sp.	1297	I	0	0		1	0	1
Insecta	Hemiptera	Lygaeidae	Kleidocerys ericae (Horváth, 1908)	167	N	3	17		2	0	22
Insecta	Hemiptera	Lygaeidae	Oxycarenus lavaterae (Fabricius, 1787)	1197	I	0	0		136	145	281
Insecta	Hemiptera	Lygaeidae	Scolopostethus decoratus (Hahn, 1833)	118	N	0	0		6	0	6
Insecta	Hemiptera	Microphysidae	Loricula elegantula (Bärensprung, 1858) *1	530	N	47	10		0	0	57
Insecta	Hemiptera	Miridae	Campyloneura virgula (Herrich-Schaeffer, 1835)	574	N	6	31		0	0	37
Insecta	Hemiptera	Miridae	Gen. sp.1	1314	I	0	0		1	0	1
Insecta	Hemiptera	Miridae	Gen. sp.2	1316	I	0	0		3	0	3
Insecta	Hemiptera	Miridae	Gen. sp.3	1374	I	1	0		0	0	1
Insecta	Hemiptera	Miridae	Heterotoma planicornis (Pallas, 1772)	535	N	0	1		0	0	1
Insecta	Hemiptera	Miridae	Monalocoris filicis (Linnaeus, 1758)	476	N	0	0		6	0	6
Insecta	Hemiptera	Miridae	Pilophorus confusus (Kirschbaum, 1856) *1	1058	N	8	29		19	0	56
Insecta	Hemiptera	Miridae	Taylorilygus apicalis (Fieber, 1861)	781	I	0	0		2	0	2
Insecta	Hemiptera	Miridae	Trigonotylus caelestialium (Kirkaldy, 1902)	1137	N	0	0		7	0	7
Insecta	Hemiptera	Nabidae	Nabis pseudoferus ibericus Remane, 1962	230	N	0	0		1	0	1
Insecta	Hemiptera	Pentatomidae	Nezara viridula (Linnaeus, 1758)	738	I	0	0		1	0	1
Insecta	Hemiptera	Psyllidae	Gen. sp.1	1276	I	0	0		12	0	12
Insecta	Hemiptera	Psyllidae	Gen. sp.2	891	I	0	0		13	0	13
Insecta	Hemiptera	Psyllidae	Strophingia harteni Hodkinson, 1981	557	E	39	0		0	0	39
Insecta	Hemiptera	Reduviidae	Empicoris rubromaculatus (Blackburn, 1889) *1	537	I	5	9		6	1	21
Insecta	Hemiptera	Triozidae	Trioza laurisilvae Hodkinson, 1990	195	N	21	0		0	0	21
Insecta	Hymenoptera	Formicidae	Hypoponera eduardi (Forel 1894)	F2	N	4	0		0	0	4
Insecta	Hymenoptera	Formicidae	Lasius grandis Forel, 1909	F1	N	101	0		454	0	555
Insecta	Hymenoptera	Formicidae	Linepithema humile (Mayr, 1868)	F3	I	0	0		30	0	30
Insecta	Hymenoptera	Formicidae	Monomorium carbonarium (F. Smith, 1858)	F4	N	0	0		5	0	5
Insecta	Hymenoptera	Formicidae	Temnothorax unifasciatus (Latreille, 1798)	F7	N	0	0		14	0	14
Insecta	Hymenoptera	Formicidae	Tetramorium sp.	F6	I	0	0		18	0	18
Insecta	Isoptera	Kalotermitidae	Cryptotermes brevis (Walker, 1953)	1250	I	0	0		1	0	1
Insecta	Microcoryphia	Machilidae	Dilta saxicola (Womersley, 1930)	279	N	0	0		3	0	3
Insecta	Neuroptera	Hemerobiidae	Gen. sp.1	954	N	0	0		3	0	3
Insecta	Neuroptera	Hemerobiidae	Gen. sp.2	1289	N	1	1		0	0	2
Insecta	Neuroptera	Hemerobiidae	Hemerobius azoricus Tjeder, 1948	200	E	9	78		4	1	92
Insecta	Phasmatodea	Phasmatidae	Carausius morosus (Sinéty, 1901)	1102	I	0	4		0	0	4
Insecta	Psocoptera	??	Gen. sp.1	1312	I	0	0		1	0	1
Insecta	Psocoptera	??	Gen. sp.2	1315	I	0	0		25	0	25
Insecta	Psocoptera	??	Gen. sp.3	1382	I	0	0		4	0	4
Insecta	Psocoptera	Caeciliusidae	Valenzuela burmeisteri (Brauer, 1876)	625	N	5	0		1	0	6
Insecta	Psocoptera	Caeciliusidae	Valenzuela flavidus (Stephens, 1836)	191	N	7	1		6	0	14
Insecta	Psocoptera	Ectopsocidae	Ectopsocus briggsi McLachlan, 1899	121	I	16	0		48	2	66
Insecta	Psocoptera	Ectopsocidae	Ectopsocus strauchi Enderlein, 1906	218	N	1	0		90	0	91
Insecta	Psocoptera	Elipsocidae	Elipsocus azoricus Meinander, 1975	184	E	18	0		5	0	23
Insecta	Psocoptera	Elipsocidae	Elipsocus brincki Badonnel, 1963	370	E	0	0		1	0	1
Insecta	Psocoptera	Epipsocidae	Bertkauia lucifuga (Rambur, 1842)	374	N	21	0		1	0	22
Insecta	Psocoptera	Peripsocidae	Peripsocus phaeopterus (Stephens, 1836)	536	N	0	0		4	0	4
Insecta	Psocoptera	Psocidae	Atlantopsocus adustus (Hagen, 1865)	205	N	63	35		3	2	103
Insecta	Psocoptera	Psocidae	Gen. sp.1	850	I	3	1		2	0	6
Insecta	Psocoptera	Trichopsocidae	Trichopsocus clarus (Banks, 1908)	478	N	163	339		579	88	1169
Insecta	Psocoptera	Trogiidae	Cerobasis sp.1	172	E	415	0		141	0	556
Insecta	Thysanoptera	Aeolothripidae	Aeolothrips gloriosus Bagnall, 1914	640	N	1	0		1	0	2
Insecta	Thysanoptera	Phlaeothripidae	Hoplothrips corticis (De Geer, 1773)	13	N	2	0		0	0	2
Insecta	Thysanoptera	Thripidae	Ceratothrips ericae (Haliday, 1836)	471	N	28	14		0	0	42
Insecta	Thysanoptera	Thripidae	Heliothrips haemorrhoidalis (Bouché, 1833)	276	I	8	0		3	0	11
Insecta	Thysanoptera	Thripidae	Hercinothrips bicinctus (Bagnall, 1919)	280	I	1	0		245	0	246
Insecta	Thysanoptera	Thripidae	Parthenothrips dracaenae (Heeger, 1854)	861	I	0	0		12	0	12
			Grand Totals			1505	2288		3773	790	8356
