# Supplementary material for: Arthropod diversity in two Historic Gardens in the Azores, Portugal
Source: Biodivers Data J. 2020 Aug 6;8:e54749. doi: 10.3897/BDJ.8.e54749 (PMC7426280; doi:10.3897/BDJ.8.e54749)
Supplement: Supplementary material 3 — The most common species in Faial Botanic Garden (FAI) and Duque da Terceira Garden (TER) - ALL SPECIES [file bdj-08-e54749-s003.xlsx]

## Sheet: Table S3
Table S3. The most common species in Faial Botanic Garden (FAI) and Duque da Terceira Garden (TER) that represented half or more of the individuals in the community (≥ 50%). Colonisation status (E- endemic, N – native, I – introduced), and trophic status (P – predators; H – herbivores; S – saprophages)
Global		Order	Family	Species	Colonisation	Trophic status	Abundance (%)
					status
Adults	FAI	Psocoptera	Trogiidae	Cerobasis cf sp.1	E	S	415 (27%)
		Psocoptera	Trichopsocidae	Trichopsocus clarus	N	S	163 (11%)
		Opiliones	Phalangiidae	Leiobunum blackwalli	N	P	138 (9%)
		Hymenoptera	Formicidae	Lasius grandis	N	P/H	101 (7%)
	TER	Psocoptera	Trichopsocidae	Trichopsocus clarus	N	S	579 (15%)
		Hymenoptera	Formicidae	Lasius grandis	N	P/H	454 (12%)
		Coleoptera	Corylophidae	Sericoderus lateralis	I	P	263 (7%)
		Thysanoptera	Thripidae	Hercinothrips bicinctus	I	H	245 (6%)
		Coleoptera	Chrysomelidae	Epitrix cucumeris	I	H	172 (5%)
		Coleoptera	Coccinellidae	Scymnus interruptus + Scymnus nubilus	N	P	162 (4%)
		Psocoptera	Trogiidae	Cerobasis cf sp.1	E	S	141 (4%)
Total	FAI	Hemiptera	Flatidae	Cyphopterum adcendens	N	H	725 (19%)
		Psocoptera	Trichopsocidae	Trichopsocus clarus	N	S	502 (13%)
		Psocoptera	Trogiidae	Cerobasis cf sp.1	E	S	415 (11%)
		Hemiptera	Lachnidae	Cinara juniperi	N	H	374 (10%)
	TER	Psocoptera	Trichopsocidae	Trichopsocus clarus	N	S	667 (15%)
		Hymenoptera	Formicidae	Lasius grandis	N	P/H	454 (10%)
		Araneae	Clubionidae	Clubiona decora	N	P	292 (6%)
		Hemiptera	Lygaeidae	Oxycarenus lavaterae	I	H	281 (6%)
		Coleoptera	Corylophidae	Sericoderus lateralis	I	P	263 (6%)
		Thysanoptera	Thripidae	Hercinothrips bicinctus	I	H	245 (5%)
		Coleoptera	Chrysomelidae	Epitrix cucumeris	I	H	172 (4%)
