# Supplementary material for: Arthropod diversity in two Historic Gardens in the Azores, Portugal
Source: Biodivers Data J. 2020 Aug 6;8:e54749. doi: 10.3897/BDJ.8.e54749 (PMC7426280; doi:10.3897/BDJ.8.e54749)
Supplement: Supplementary material 4 — The most common species in Faial Botanic Garden (FAI) and Duque da Terceira Garden (TER) that represented half or more of the individuals in the Araneae, Coleoptera and Hemiptera community (≥ 50%). [file bdj-08-e54749-s004.xlsx]

## Sheet: Table S4
Table S4. The most common species in Faial Botanic Garden (FAI) and Duque da Terceira Garden (TER) that represented half or more of the individuals in the Araneae, Coleoptera and Hemiptera community (≥ 50%). colonisation status (E- endemic, N – native, I – introduced), and trophic status (P – predators; H – herbivores; S – saprophages)
			Species	Colonisation status	Trophic status	Abundance
						(%)
Araneae	Adults	FAI	Emblyna acoreensis	E	P	32 (20%)
			Entelecara schmitzi	I	P	31 (20%)
			Clubiona decora	N	P	23 (15%)
		TER	Clubiona decora	N	P	50 (38%)
			Tenuiphantes tenuis	I	P	10 (8%)
			Paidiscura orotavensis	N	P	9 (7%)
	Total	FAI	Neoscona crucifera	I	P	287 (39%)
			Clubiona decora	N	P	172 (23%)
		TER	Clubiona decora	N	P	292 (59%)
Coleoptera	Adults	FAI	Tachyporus nitidulus	I	P	48 (27%)
			Longitarsus kutscherae	I	H	25 (14%)
			Gen sp. (Chrysomelidae)	I	H	19 (11%)
		TER	Sericoderus lateralis	I	P	263 (18%)
			Epitrix cucumeris	I	H	172 (12%)
			Scymnus interruptus + Scymnus nubilus	N	P	162 (11%)
			Gymnetron pascuorum	I	H	125 (9%)
			Kalcapion semivittatum semivittatum	N	H	85 (6%)
Hemiptera	Adults	FAI	Loricula elegantula	N	P	47 (31%)
			Strophingia harteni	E	H	39 (26%)
		TER	Oxycarenus lavaterae	I	H	136 (34%)
			Euscelidius variegatus	N	H	40 (10%)
			Siphanta acuta	I	H	30 (8%)
	Total	FAI	Cyphopterum adcendens	N	H	725 (54%)
		TER	Oxycarenus lavaterae	I	H	281 (41%)
			Siphanta acuta	I	H	163 (24%)
